# Supplementary material for: Efficient and precise Ultra-QuickDASH scale measuring lymphedema impact developed using computerized adaptive testing
Source: Springer Nature journal article supplement (doi:10.1007/s11136-021-02979-y), 2021-09-29
Supplement: MOESM3 [file 19713276]

## Revised *Quick* DASH

Please rate your ability to do the following activities in the last week by circling the number below the appropriate response.

|                                                                                                                                                                          | NO DIFFICULTY             | MILD DIFFICULTY         | MODERATE DIFFICULTY       | SEVERE DIFFICULTY   | UNABLE           |
|--------------------------------------------------------------------------------------------------------------------------------------------------------------------------|---------------------------|-------------------------|---------------------------|---------------------|------------------|
| 1. Open a tight or new jar.                                                                                                                                              | 1                         | 2                       | 3                         | 4                   | 5                |
| 2. Do heavy household chores (e.g., wash walls, floors).                                                                                                                 | 1                         | 2                       | 3                         | 4                   | 5                |
| 3. Carry a shopping bag or briefcase.                                                                                                                                    | 1                         | 2                       | 3                         | 4                   | 5                |
| 4. Wash your back.                                                                                                                                                       | 1                         | 2                       | 3                         | 4                   | 5                |
| 5. Use a knife to cut food.                                                                                                                                              | 1                         | 2                       | 3                         | 4                   | 4                |
| 6. Recreational activities in which you take some force or impact through your arm, shoulder or hand (e.g., golf, hammering, tennis, etc.).                              | 1                         | 2                       | 3                         | 4                   | 5                |
|                                                                                                                                                                          | <b>NOT AT ALL</b>         | <b>SLIGHTLY</b>         | <b>MODERATELY</b>         | <b>QUITE A BIT</b>  | <b>EXTREMELY</b> |
| 7. During the past week, to what extent has your arm, shoulder or hand problem interfered with your normal social activities with family, friends, neighbours or groups? | 1                         | 2                       | 3                         | 4                   | 5                |
|                                                                                                                                                                          | <b>NOT LIMITED AT ALL</b> | <b>SLIGHTLY LIMITED</b> | <b>MODERATELY LIMITED</b> | <b>VERY LIMITED</b> | <b>UNABLE</b>    |
| 8. During the past week, were you limited in your work or other regular daily activities as a result of your arm, shoulder or hand problem?                              | 1                         | 2                       | 3                         | 4                   | 5                |
| <b>Please rate the severity of the following symptoms in the last week. (circle number)</b>                                                                              | <b>NONE</b>               | <b>MILD</b>             | <b>MODERATE</b>           | <b>SEVERE</b>       | <b>EXTREME</b>   |
| 9. Arm, shoulder or hand pain.                                                                                                                                           | 1                         | 2                       | 3                         | 4                   | 5                |
| 10. Tingling (pins and needles) in your arm, shoulder or hand.                                                                                                           | 1                         | 2                       | 3                         | 4                   | 5                |

**QuickDASH DISABILITY/SYMPTOM SCORE** =  $\left( \left[ \frac{(\text{sum of } n \text{ responses})}{n} \right] - 1 \right) \times 25$ , where n is equal to the number of completed responses.

A **QuickDASH** score may **not** be calculated if there is greater than 1 missing item.
